# Supplementary material for: Assessment of Chronic Sublethal Effects of Imidacloprid on Honey Bee Colony Health
Source: PubMed Central journal article supplement (PMC4364903; doi:10.1371/journal.pone.0118748), 2015-03-18
Supplement: pone.0118748.s001.pdf [file pone.0118748.s001.pdf]

**Table S1.** Effects of imidacloprid doses on the performance of the 2009 colonies exposed to untreated or spiked diet patties for 12 weeks. Data were collected on August 6 at the end of the exposure period.

| Performance endpoint | Exposure dose                                           |                 |                 |                 | ANOVA results |      |                |
|----------------------|---------------------------------------------------------|-----------------|-----------------|-----------------|---------------|------|----------------|
|                      | Mean ( $\pm$ SE) percentage of total frame area covered |                 |                 |                 | Df            | F    | <i>p</i> value |
| Bees                 | Untreated                                               | 5 $\mu$ g/kg    | 20 $\mu$ g/kg   | 100 $\mu$ g/kg  | 3, 31         | 0.68 | 0.571          |
| Capped brood         | 9.2 $\pm$ 1.13                                          | 8.9 $\pm$ 1.21  | 8.12 $\pm$ 1.68 | 8.12 $\pm$ 1.43 | 3, 31         | 0.28 | 0.841          |
| Capped honey         | 11.7 $\pm$ 2.39                                         | 13.1 $\pm$ 2.71 | 13.1 $\pm$ 2.33 | 19.3 $\pm$ 2.47 | 3, 31         | 1.82 | 0.165          |
| Beebread             | 5.7 $\pm$ 1.16                                          | 7.2 $\pm$ 1.64  | 7.6 $\pm$ 1.67  | 8.00 $\pm$ 1.28 | 3, 35         | 0.46 | 0.712          |
| Drawn out cells      | 59.5 $\pm$ 5.38                                         | 66.8 $\pm$ 5.17 | 61.1 $\pm$ 4.82 | 70.3 $\pm$ 3.53 | 3, 31         | 1.04 | 0.390          |
