# Supplementary material for: Assessment of Chronic Sublethal Effects of Imidacloprid on Honey Bee Colony Health
Source: PubMed Central journal article supplement (PMC4364903; doi:10.1371/journal.pone.0118748), 2015-03-18
Supplement: pone.0118748.s002.pdf [file pone.0118748.s002.pdf]

**Table S2.** Effects of imidacloprid doses on the performance of the 2009 colonies exposed to untreated or spiked diet patties for 12 weeks. Data were collected on October 6 prior to overwinter and two months after exposure.

| Performance endpoint | Exposure dose                                           |                 |                 |                 | ANOVA results |      |                |
|----------------------|---------------------------------------------------------|-----------------|-----------------|-----------------|---------------|------|----------------|
|                      | Mean ( $\pm$ SE) percentage of total frame area covered |                 |                 |                 | Df            | F    | <i>p</i> value |
| Bees                 | Untreated                                               | 5 $\mu$ g/kg    | 20 $\mu$ g/kg   | 100 $\mu$ g/kg  | 3, 33         | 1.35 | 0.254          |
| Capped brood         | 24.5 $\pm$ 1.48                                         | 21.4 $\pm$ 2.10 | 20.9 $\pm$ 2.70 | 23.1 $\pm$ 1.85 | 3, 33         | 0.00 | 0.990          |
| Capped honey         | 4.01 $\pm$ 0.51                                         | 3.7 $\pm$ 0.76  | 3.9 $\pm$ 0.77  | 4.4 $\pm$ 0.66  | 3, 33         | 0.69 | 0.556          |
| Beebread             | 22.8 $\pm$ 3.28                                         | 21.9 $\pm$ 2.85 | 24.8 $\pm$ 2.81 | 27.6 $\pm$ 2.47 | 3, 33         | 0.95 | 0.428          |
| Drawn out cells      | 2.4 $\pm$ 0.64                                          | 4.0 $\pm$ 0.72  | 3.7 $\pm$ 0.94  | 3.3 $\pm$ 0.57  | 3, 33         | 1.29 | 0.295          |
