# Supplementary material for: Assessment of Chronic Sublethal Effects of Imidacloprid on Honey Bee Colony Health
Source: PubMed Central journal article supplement (PMC4364903; doi:10.1371/journal.pone.0118748), 2015-03-18
Supplement: pone.0118748.s003.pdf [file pone.0118748.s003.pdf]

**Table S3.** Effects of imidacloprid doses on the performance of the 2010 colonies exposed to untreated or spiked diet patties for 12 weeks. Data were collected on August 19 at the end of the exposure period.

| Performance endpoint | Exposure dose                                           |                 |                 |                 | ANOVA results |      |                |
|----------------------|---------------------------------------------------------|-----------------|-----------------|-----------------|---------------|------|----------------|
|                      | Mean ( $\pm$ SE) percentage of total frame area covered |                 |                 |                 | Df            | F    | <i>p</i> value |
| Bees                 | Untreated                                               | 5 $\mu$ g/kg    | 20 $\mu$ g/kg   | 100 $\mu$ g/kg  | 3, 24         | 0.59 | 0.623          |
| Capped brood         | 6.7 $\pm$ 1.51                                          | 8.5 $\pm$ 2.35  | 9.05 $\pm$ 2.18 | 10.1 $\pm$ 1.60 | 3, 18         | 1.01 | 0.412          |
| Capped honey         | 3.9 $\pm$ 1.54                                          | 2.3 $\pm$ 0.70  | 2.2 $\pm$ 0.119 | 8.8 $\pm$ 2.82  | 3, 24         | 1.34 | 0.286          |
| Beebread             | 9.5 $\pm$ 2.68                                          | 6.7 $\pm$ 2.46  | 5.9 $\pm$ 1.73  | 6.2 $\pm$ 0.79  | 3, 18         | 0.65 | 0.595          |
| Drawn out cells      | 73.3 $\pm$ 7.03                                         | 64.5 $\pm$ 5.24 | 66.4 $\pm$ 6.36 | 70.1 $\pm$ 4.51 | 3, 24         | 0.45 | 0.722          |
