# Supplementary material for: Assessment of Chronic Sublethal Effects of Imidacloprid on Honey Bee Colony Health
Source: PubMed Central journal article supplement (PMC4364903; doi:10.1371/journal.pone.0118748), 2015-03-18
Supplement: pone.0118748.s004.pdf [file pone.0118748.s004.pdf]

**Table S4.** Effects of imidacloprid doses on the performance of the 2010 colonies exposed to untreated or spiked diet patties for 12 weeks. Data were collected on October 7 prior to overwinter and about seven weeks after exposure.

| Performance endpoint | Exposure dose                                           |                 |                 |                  | ANOVA results |      |                |
|----------------------|---------------------------------------------------------|-----------------|-----------------|------------------|---------------|------|----------------|
|                      | Mean ( $\pm$ SE) percentage of total frame area covered |                 |                 |                  | Df            | F    | <i>p</i> value |
| Bees                 | Untreated                                               | 5 $\mu$ g/kg    | 20 $\mu$ g/kg   | 100 $\mu$ g/kg   | 3, 18         | 0.20 | 0.896          |
| Capped brood         | 19.1 $\pm$ 1.72                                         | 19.4 $\pm$ 3.82 | 19.1 $\pm$ 2.31 | 18.4 $\pm$ 3.22  | 3, 24         | 0.32 | 0.810          |
| Capped honey         | 10.0 $\pm$ 1.41                                         | 10.8 $\pm$ 2.32 | 8.7 $\pm$ 0.94  | 10.0 $\pm$ 1.97  | 3, 24         | 1.45 | 0.253          |
| Beebread             | 11.7 $\pm$ 2.36                                         | 5.85 $\pm$ 1.29 | 9.25 $\pm$ 2.00 | 10.76 $\pm$ 3.16 | 3, 18         | 1.18 | 0.345          |
| Drawn out cells      | 4.4 $\pm$ 1.75                                          | 2.1 $\pm$ 0.73  | 2.9 $\pm$ 0.94  | 1.7 $\pm$ 0.41   | 3, 18         | 1.00 | 0.416          |
